# Supplementary material
Source: Preprints.org preprint supplement (doi:10.20944/preprints202104.0232.v1)
Supplement: Supplementary file 1 [file supplementary]

### Supplementary Table S1

Reagents used in this work

| Reagent          | Reference | Supplier               |
|------------------|-----------|------------------------|
| Doxorubicin      | 16416646  | Fisher BioReagents     |
| Chaetocin        | C9492     | Sigma-Aldrich-Merck    |
| Olaparib         | O-9201    | LC Laboratories        |
| Tazemetostat     | S7128     | Selleck                |
| JMJD2i           | 420201    | Calbiochem (Millipore) |
| NaF              | 20154     | Sigma-Aldrich-Merck    |
| Hepes            | H3375     | Sigma-Aldrich-Merck    |
| Triton X-100     | T8787     | Sigma-Aldrich-Merck    |
| SDS              | L3771     | Sigma-Aldrich-Merck    |
| Na orthovanadate | 450243    | Sigma-Aldrich-Merck    |
| PMSF             | 78830     | Sigma-Aldrich-Merck    |
| aprotinin        | A6103     | Sigma-Aldrich-Merck    |
| leupeptin        | L9783     | Sigma-Aldrich-Merck    |
| Tween 20         | P2287     | Sigma-Aldrich-Merck    |
