# Supplementary material
Source: Preprints.org preprint supplement (doi:10.20944/preprints202104.0232.v1)
Supplement: Supplementary file 2 [file supplementary]

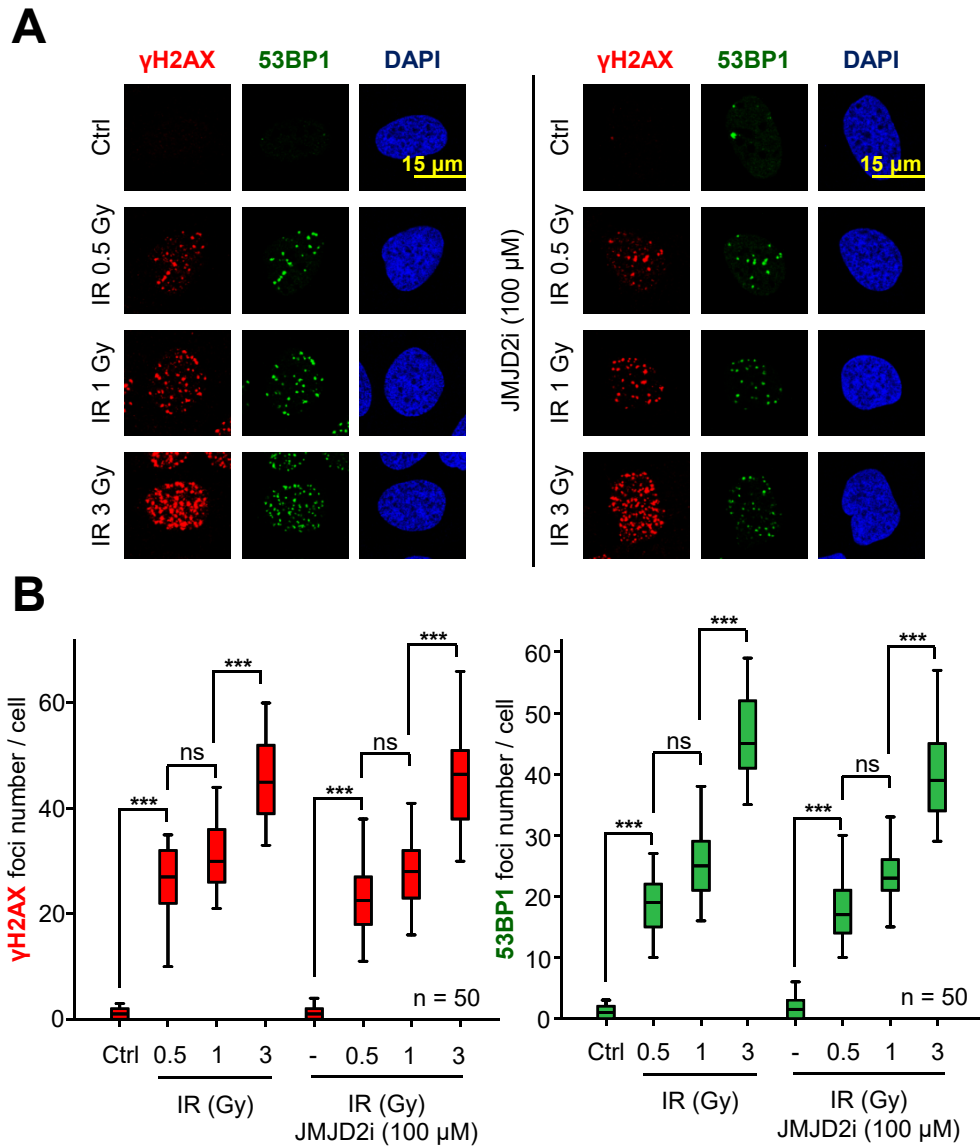

**Figure S8.** The assembly of 53BP1 foci is not affected by JMJD2i treatment, which inhibits lysine demethylation, after inducing DSBs with IR in U2OS cells. **A.**  $\gamma$ H2AX and 53BP1 foci formation in response to JMJD2 inhibitor and/or IR. **B.** Quantification of  $\gamma$ H2AX and 53BP1 foci after JMJD2i treatment and inducing DNA damage by IR. ns: not significant, \*\*\*  $p < 0.001$ .
