# Supplementary material
Source: Preprints.org preprint supplement (doi:10.20944/preprints202104.0232.v1)
Supplement: Supplementary file 3 [file supplementary]

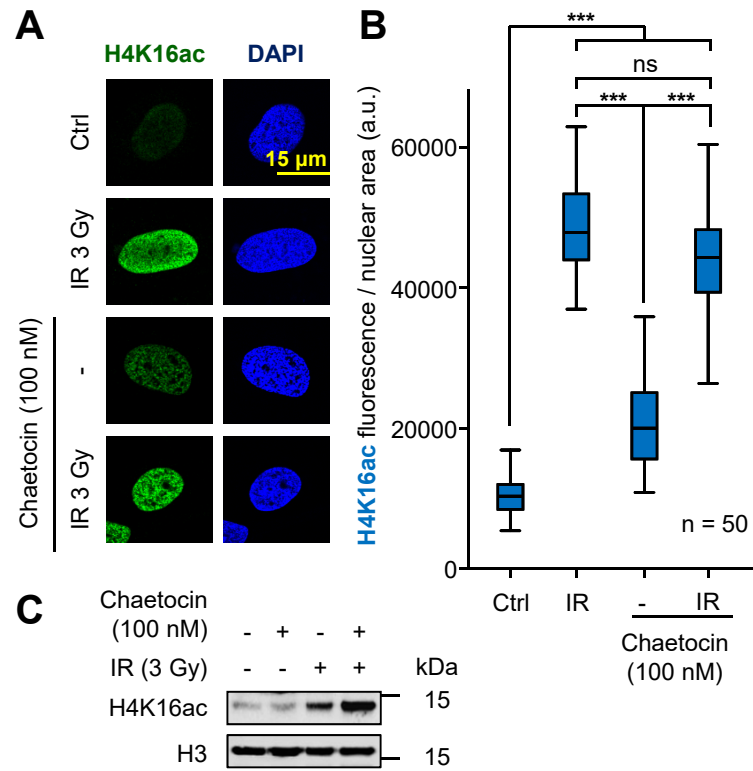

**Figure S5.** Effect of chaetocin on the acetylation of histone H4 in lysine 16 (H4K16ac) in U2OS cells treated with IR. **A.** Detection of H4K16ac by immunofluorescence. **B.** Quantification of the increase in HK16ac induced by IR. ns: not significant, \*\*\*  $p < 0.001$ . **C.** Immunoblot to show the increase of HK16ac levels by IR.
