# Supplementary material
Source: Preprints.org preprint supplement (doi:10.20944/preprints202104.0232.v1)
Supplement: Supplementary file 4 [file supplementary]

**A**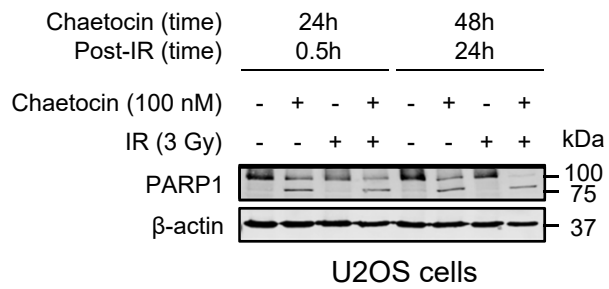**B**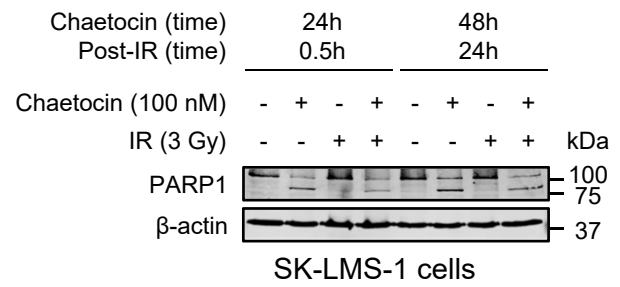

**Figure S9.** Chaetocin induces apoptotic PARP cleavage in response to DNA damage caused by IR in sarcoma cells. **A.** Effect of chaetocin and/or IR on PARP1 cleavage at different points in time in U2OS osteosarcoma cells deprived of serum mitogenic signals. **B.** Effect of chaetocin and/or IR on PARP1 cleavage at different time points in SK-LMS-1 leiomyosarcoma cells.
