# Supplementary material
Source: Preprints.org preprint supplement (doi:10.20944/preprints202104.0232.v1)
Supplement: Supplementary file 5 [file supplementary]

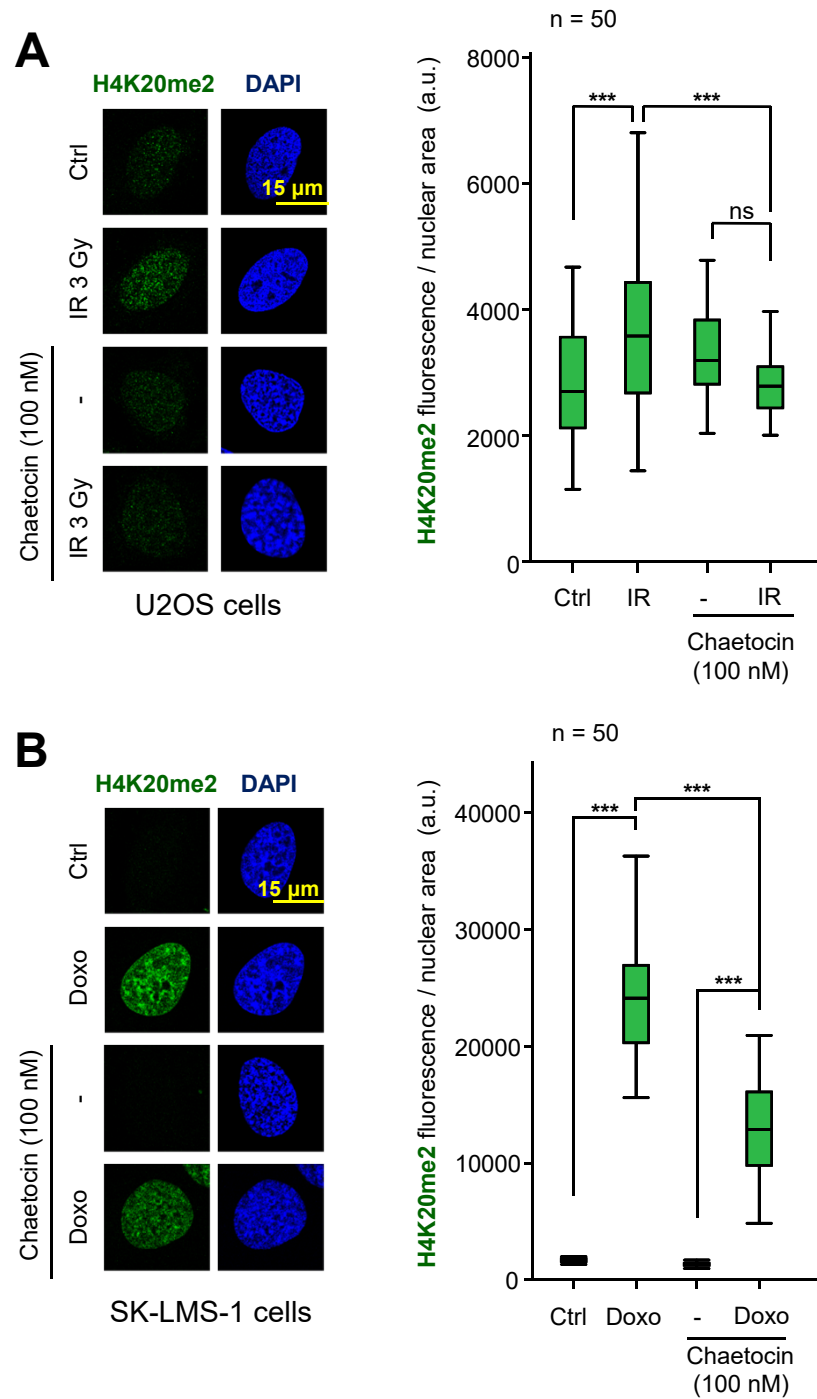

**Figure S4.** Effect of chaetocin on H4K20me2 induced by IR or doxorubicin. A. Effect of chaetocin on H4K20me2 induced by IR in U2OS cells. (B) Effect of chaetocin on H4K20me2 induced by doxorubicin in SK-LMS-1 cells. Quantification of nuclear fluorescence associated with H4K20 dimethylation in response to chaetocin, IR, doxorubicin or their combination (right). ns: not significant, \*\*\*  $p < 0.001$ .
