# Supplementary material
Source: Preprints.org preprint supplement (doi:10.20944/preprints202104.0232.v1)
Supplement: Supplementary file 6 [file supplementary]

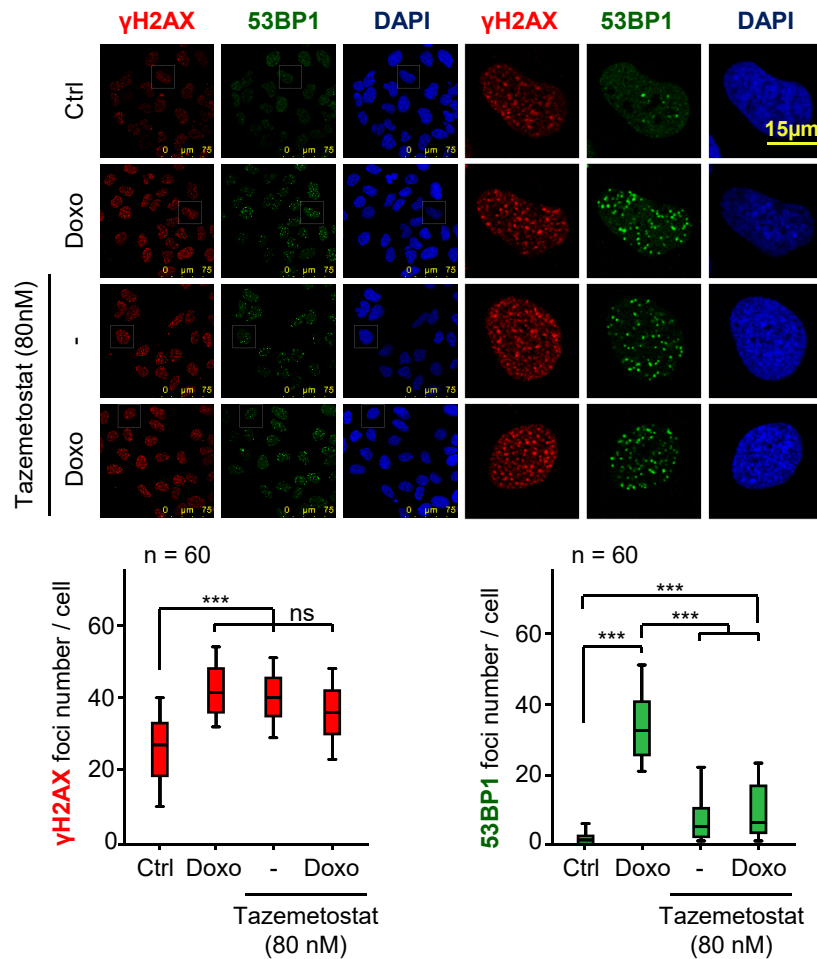

**Figure S6.** Effect of tazemetostat on γH2AX and 53BP1 foci in response to doxorubicin treatment in U2OS osteosarcoma cells deprived of serum. Effect of tazemetostat on the formation of γH2AX (red) and 53BP1 (green) foci. The detail images selected indicated by boxes are shown to the right. Graphs at the bottom show the quantification of γH2AX and 53BP1 foci. ns: not significant. \*\*\*  $p < 0.001$ .
