# Supplementary material
Source: Preprints.org preprint supplement (doi:10.20944/preprints202104.0232.v1)
Supplement: Supplementary file 7 [file supplementary]

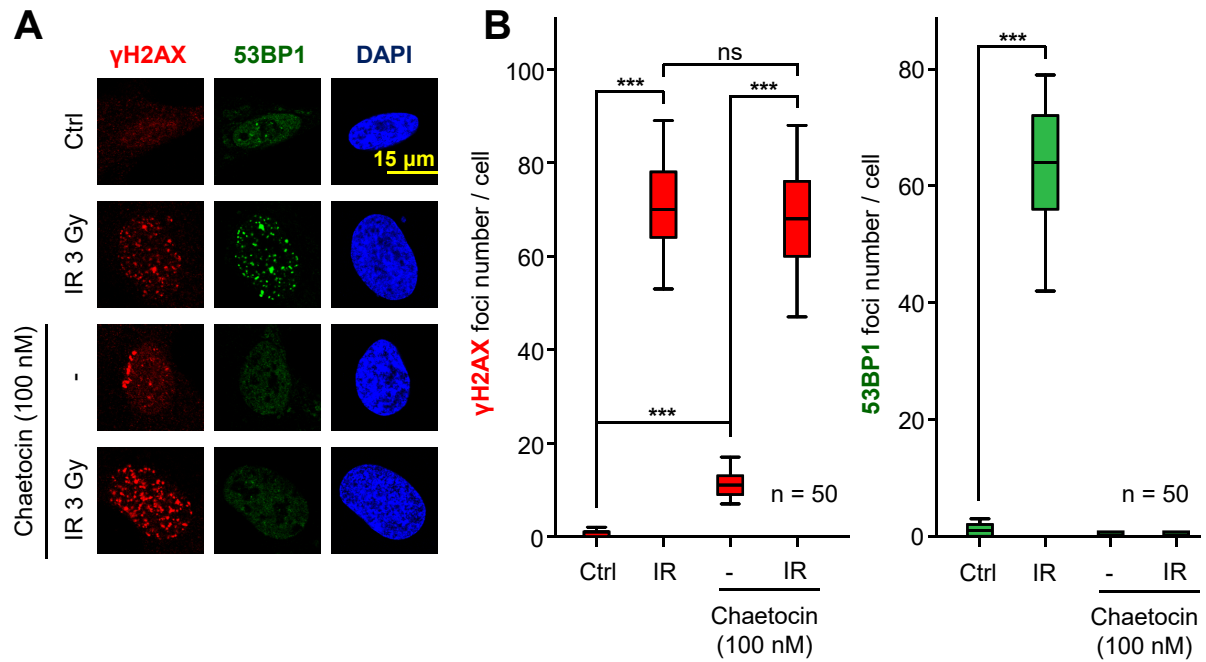

**Figure S2.** Chaetocin impairs the assembly of 53BP1 foci induced by IR in SK-LMS-1 leiomyosarcoma serum-deprived cells. **A.** Effect of chaetocin on  $\gamma$ H2AX and 53BP1 foci formation after inducing DNA damage with different doses of IR. **B.** Quantification of  $\gamma$ H2AX (left) and 53BP1 (right) foci in response to chaetocin and/or IR. ns: not significant, \*\*\*  $p < 0.001$ .
