# Supplementary material
Source: Preprints.org preprint supplement (doi:10.20944/preprints202104.0232.v1)
Supplement: Supplementary file 8 [file supplementary]

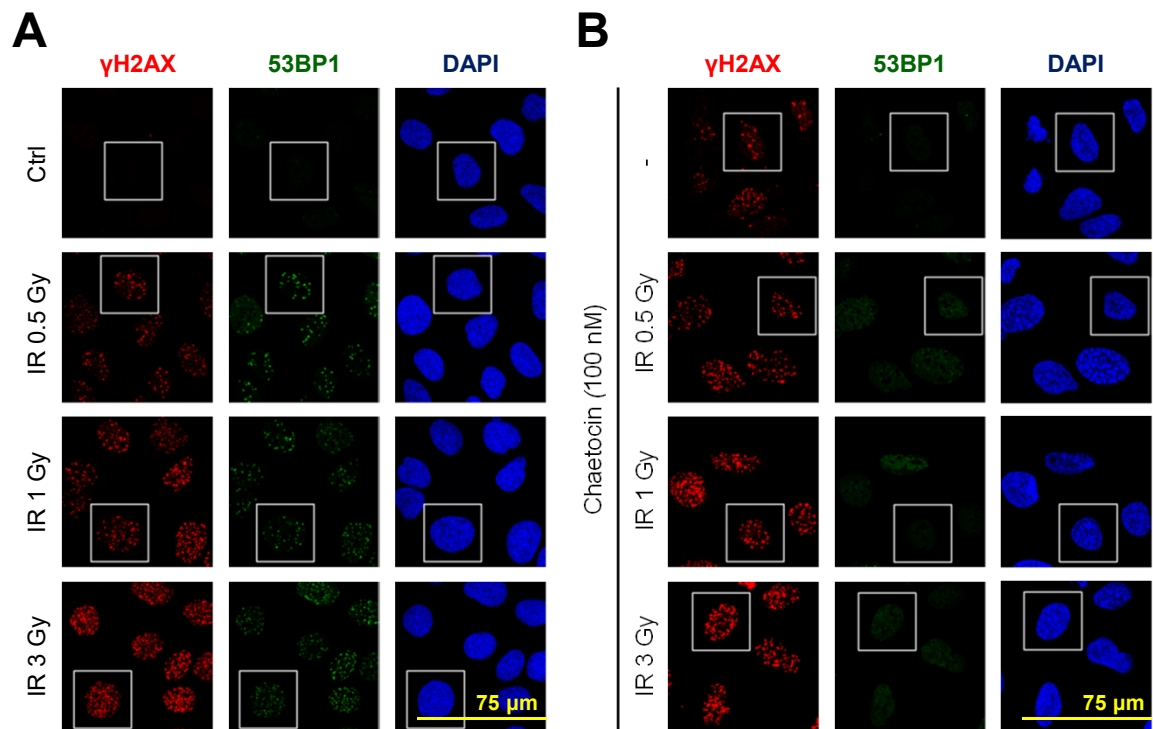

**Figure S1.** Chaetocin impairs 53BP1 foci formation induced by IR in U2OS osteosarcoma cells deprived of serum. **A.** Assembly of  $\gamma$ H2AX and 53BP1 foci in response to different doses of IR. **B.** Effect of chaetocin on  $\gamma$ H2AX and 53BP1 foci formation after inducing DNA damage by IR. The detail images selected for Figure 1 are indicated by boxes.
