# Supplementary material
Source: Preprints.org preprint supplement (doi:10.20944/preprints202104.0232.v1)
Supplement: Supplementary file 9 [file supplementary]

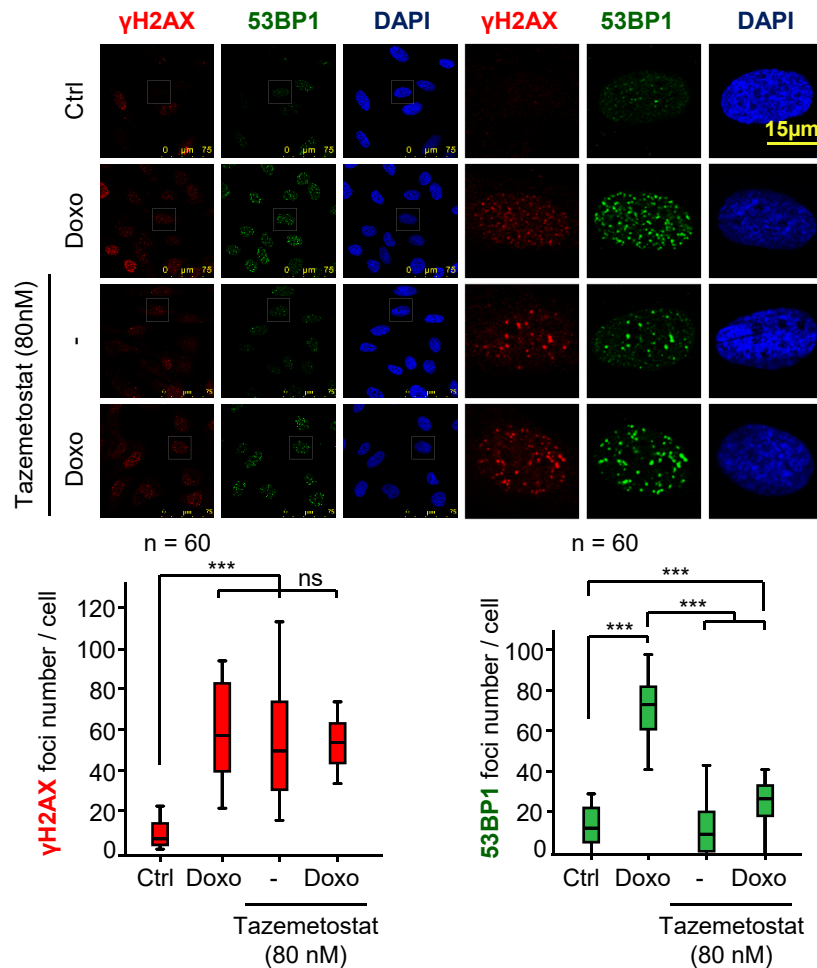

**Figure S7.** Effect of tazemetostat on  $\gamma$ H2AX and 53BP1 foci in response to doxorubicin treatment in SK-LMS-1 leiomyosarcoma cells deprived of serum. Effect of tazemetostat on the formation of  $\gamma$ H2AX (red) and 53BP1 (green) foci. The detail images selected indicated by boxes are shown to the right. Graphs at the bottom show the quantification of  $\gamma$ H2AX and 53BP1 foci. ns: not significant. \*\*\*  $p < 0.001$ .
