# Supplementary material
Source: Preprints.org preprint supplement (doi:10.20944/preprints202104.0232.v1)
Supplement: Supplementary file 10 [file supplementary]

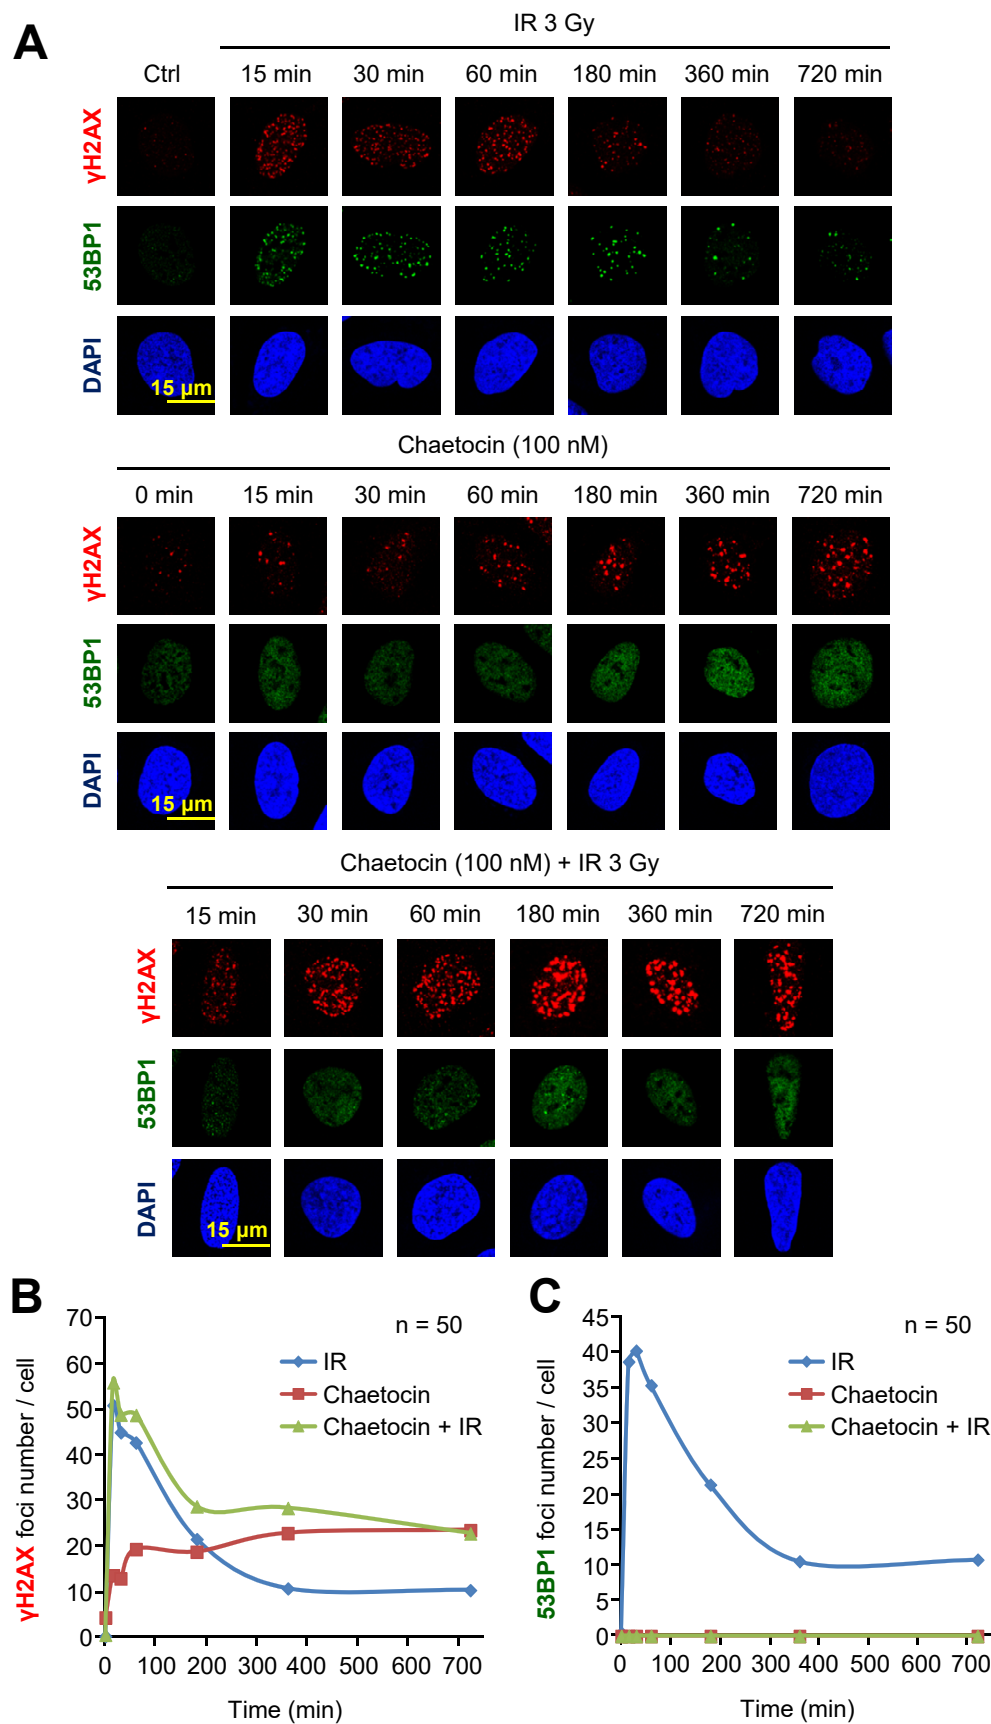

**Figure S3.** The impairment of 53BP1 foci formation induced by chaetocin is independently of the post-irradiation time in U2OS cells. **A.** Assembly of  $\gamma$ H2AX and 53BP1 foci in response to IR (top), chaetocin (center) and their combination (bottom). **B.C.** Quantification of  $\gamma$ H2AX (B) and 53BP1(C) foci after chaetocin and/or IR treatments.
